# Supplementary material
Source: Springer Nature journal article supplement (https://www.springermedizin.de/resource/supplementary/13561_2012_46_MOESM3_ESM.pdf/9687372)

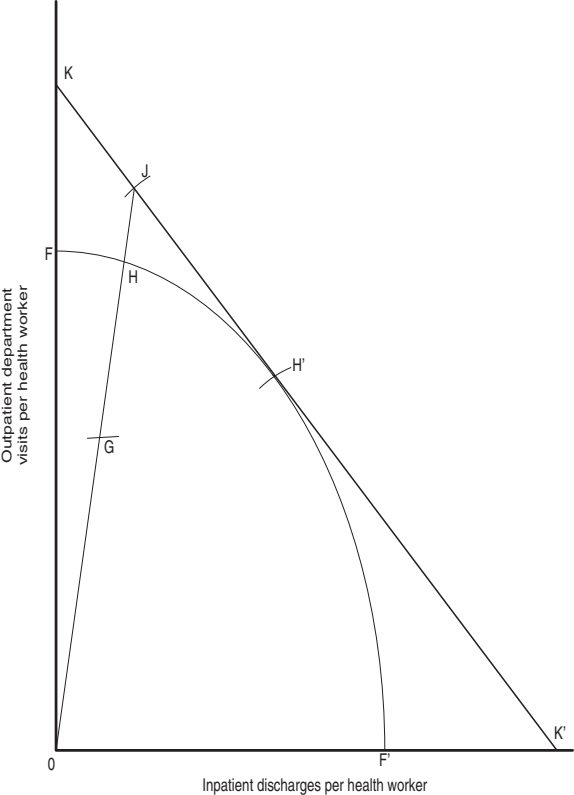

Supplement: MOESM3 [file 9687372]
